# Supplementary material for: Antihypertensive Activity of Milk Fermented by Lactiplantibacillus plantarum SR37-3 and SR61-2 in L-NAME-Induced Hypertensive Rats
Source: MDPI journal article supplement (doi:10.3390/foods11152332), 2022-08-04
Supplement: s1 [file s1]

# Antihypertensive Activity of Milk Fermented by *Lactiplantibacillus plantarum* SR37-3 and SR61-2 in L-NAME-Induced Hypertensive Rats

Lin Yuan <sup>1,2</sup>, Ying Li <sup>2</sup>, Moutong Chen <sup>2</sup>, Liang Xue <sup>2</sup>, Juan Wang <sup>2</sup>, Yu Ding <sup>2</sup>, Jumei Zhang <sup>2</sup>, Shi Wu <sup>2</sup>, Qinghua Ye <sup>2</sup>, Shuhong Zhang <sup>2</sup>, Runshi Yang <sup>2</sup>, Hui Zhao <sup>2</sup>, Lei Wu <sup>2</sup>, Tingting Liang <sup>2</sup>, Xinqiang Xie <sup>2</sup> and Qingping Wu <sup>2,\*</sup>

**Table S1.** Detection of different metabolites in serum samples.

| Different metabolites                   | Formula                                                       | Molecular Weight | RT [min] | VIP  | p-Value | HMDB ID     | Scan mode |
|-----------------------------------------|---------------------------------------------------------------|------------------|----------|------|---------|-------------|-----------|
| Different metabolites between W and LN  |                                                               |                  |          |      |         |             |           |
| 2-palmitoyl-sn-glycero-3-phosphocholine | C <sub>24</sub> H <sub>50</sub> N O <sub>7</sub> P            | 495.33           | 14.12    | 6.05 | 0.0282  | HMDB0061709 | +         |
| L-Valine                                | C <sub>5</sub> H <sub>11</sub> N O <sub>2</sub>               | 117.08           | 1.26     | 5.03 | 0.0205  | HMDB0000883 | +         |
| Creatine                                | C <sub>4</sub> H <sub>9</sub> N <sub>3</sub> O <sub>2</sub>   | 131.07           | 1.02     | 4.10 | 0.0301  | HMDB0000064 | +         |
| Platelet-activating factor              | C <sub>26</sub> H <sub>54</sub> N O <sub>7</sub> P            | 523.36           | 17.24    | 6.47 | 0.0345  | METPA0517   | +         |
| L-(-)-Methionine                        | C <sub>5</sub> H <sub>11</sub> N O <sub>2</sub> S             | 149.05           | 1.29     | 3.62 | 0.0012  | HMDB0000696 | +         |
| Crotonic acid                           | C <sub>4</sub> H <sub>6</sub> O <sub>2</sub>                  | 86.04            | 2.30     | 1.79 | 0.0311  | HMDB0010720 | +         |
| Diethylamine                            | C <sub>4</sub> H <sub>11</sub> N                              | 73.09            | 25.15    | 3.72 | 0.0037  | HMDB0041878 | +         |
| Acetyl-beta -methylcholine              | C <sub>8</sub> H <sub>17</sub> N O <sub>2</sub>               | 159.13           | 1.25     | 1.92 | 0.0280  | HMDB0015654 | +         |
| 5-Methylcytosine                        | C <sub>5</sub> H <sub>7</sub> N <sub>3</sub> O                | 125.06           | 1.85     | 1.05 | 0.0352  | HMDB0002894 | +         |
| Oleamide                                | C <sub>18</sub> H <sub>35</sub> N O                           | 281.27           | 21.60    | 2.48 | 0.0015  | HMDB0002117 | +         |
| Phenazone                               | C <sub>11</sub> H <sub>12</sub> N <sub>2</sub> O              | 188.09           | 3.18     | 2.67 | 0.0075  | HMDB0015503 | +         |
| Nicotinamide                            | C <sub>6</sub> H <sub>6</sub> N <sub>2</sub> O                | 122.05           | 1.29     | 2.61 | 0.0438  | HMDB0001406 | +         |
| 5-Hydroxyindole-3-acetic acid           | C <sub>10</sub> H <sub>9</sub> N O <sub>3</sub>               | 191.06           | 3.28     | 2.41 | 0.0055  | HMDB0000763 | +         |
| Metixene                                | C <sub>20</sub> H <sub>23</sub> N S                           | 309.15           | 17.24    | 1.63 | 0.0362  | HMDB0014484 | +         |
| 4-Hydroxycoumarin                       | C <sub>9</sub> H <sub>6</sub> O <sub>3</sub>                  | 162.03           | 6.52     | 1.08 | 0.0331  | HMDB0003654 | +         |
| Hexylamine                              | C <sub>6</sub> H <sub>15</sub> N                              | 101.12           | 25.15    | 2.01 | 0.0140  | HMDB0032323 | +         |
| Betaine                                 | C <sub>5</sub> H <sub>11</sub> N O <sub>2</sub>               | 117.08           | 25.17    | 1.22 | 0.0282  | HMDB0000043 | +         |
| Palmitoleic Acid                        | C <sub>16</sub> H <sub>30</sub> O <sub>2</sub>                | 276.21           | 15.79    | 1.04 | 0.0096  | HMDB0003229 | +         |
| PEG-4                                   | C <sub>8</sub> H <sub>18</sub> O <sub>5</sub>                 | 194.12           | 3.48     | 1.09 | 0.0254  | HMDB0061705 | +         |
| Glu-leu                                 | C <sub>11</sub> H <sub>20</sub> N <sub>2</sub> O <sub>5</sub> | 260.14           | 4.18     | 1.11 | 0.0157  | HMDB0028823 | +         |

| Noramidopyrine                                 | C <sub>12</sub> H <sub>15</sub> N <sub>3</sub> O              | 217.12           | 3.54     | 1.37  | 0.0091  | HMDB0013839 | +         |
|------------------------------------------------|---------------------------------------------------------------|------------------|----------|-------|---------|-------------|-----------|
| alpha -Linolenic acid                          | C <sub>18</sub> H <sub>30</sub> O <sub>2</sub>                | 278.22           | 20.26    | 1.18  | 0.0082  | HMDB0001388 | +         |
| Histamine                                      | C <sub>5</sub> H <sub>9</sub> N <sub>3</sub>                  | 111.08           | 3.76     | 1.07  | 0.0012  | HMDB0000870 | +         |
| Different metabolites                          | Formula                                                       | Molecular Weight | RT [min] | VIP   | p-Value | HMDB ID     | Scan mode |
| Arachidonic acid                               | C <sub>20</sub> H <sub>32</sub> O <sub>2</sub>                | 304.24           | 17.90    | 6.16  | 0.0018  | HMDB0001043 | -         |
| (+/-)11(12)-EET                                | C <sub>20</sub> H <sub>32</sub> O <sub>3</sub>                | 320.23           | 11.67    | 3.52  | 0.0277  | HMDB0010409 | -         |
| 8Z,11Z,14Z-Eicosatrienoic acid                 | C <sub>20</sub> H <sub>34</sub> O <sub>2</sub>                | 306.26           | 19.81    | 1.33  | 0.0358  | HMDB0002925 | -         |
| Adrenic acid                                   | C <sub>22</sub> H <sub>36</sub> O <sub>2</sub>                | 332.27           | 21.26    | 1.78  | 0.0047  | HMDB0002226 | -         |
| D-(+)-Tryptophan                               | C <sub>11</sub> H <sub>12</sub> N <sub>2</sub> O <sub>2</sub> | 204.09           | 3.76     | 1.61  | 0.0010  | HMDB0013609 | -         |
| beta-Muricholic acid                           | C <sub>24</sub> H <sub>40</sub> O <sub>5</sub>                | 408.29           | 7.87     | 1.19  | 0.0304  | HMDB0000415 | -         |
| L-Phenylalanine                                | C <sub>9</sub> H <sub>11</sub> N O <sub>2</sub>               | 165.08           | 2.926    | 1.01  | 0.0208  | HMDB0000159 | -         |
| Different metabolites between LN and LN+SR37-3 |                                                               |                  |          |       |         |             |           |
| L-Phenylalanine                                | C <sub>9</sub> H <sub>11</sub> N O <sub>2</sub>               | 165.08           | 3.25     | 17.64 | 0.0262  | HMDB0000159 | +         |
| L-Valine                                       | C <sub>5</sub> H <sub>11</sub> N O <sub>2</sub>               | 117.08           | 1.25     | 5.79  | 0.0130  | HMDB0000883 | +         |
| Choline                                        | C <sub>5</sub> H <sub>13</sub> N O                            | 103.10           | 1.46     | 1.18  | 0.0068  | HMDB0000097 | +         |
| L-(-)-Methionine                               | C <sub>5</sub> H <sub>11</sub> N O <sub>2</sub> S             | 149.05           | 1.29     | 3.39  | 0.0174  | HMDB0000696 | +         |
| Uric acid                                      | C <sub>5</sub> H <sub>4</sub> N <sub>4</sub> O <sub>3</sub>   | 168.03           | 1.72     | 1.93  | 0.0175  | HMDB0000289 | +         |
| Nicotinamide                                   | C <sub>6</sub> H <sub>6</sub> N <sub>2</sub> O                | 122.05           | 1.60     | 1.23  | 0.0322  | HMDB0001406 | +         |
| Acetyl-beta-methylcholine                      | C <sub>8</sub> H <sub>17</sub> N O <sub>2</sub>               | 159.13           | 1.25     | 4.42  | 0.0007  | HMDB0015654 | +         |
| Phenazone                                      | C <sub>11</sub> H <sub>12</sub> N <sub>2</sub> O              | 188.09           | 3.18     | 3.21  | 0.0182  | HMDB0015503 | +         |
| Methyl indole-3-acetate                        | C <sub>11</sub> H <sub>11</sub> N O <sub>2</sub>              | 189.08           | 7.87     | 1.74  | 0.0416  | HMDB0029738 | +         |
| Creatinine                                     | C <sub>4</sub> H <sub>7</sub> N <sub>3</sub> O                | 113.06           | 0.99     | 1.39  | 0.0276  | HMDB0000562 | +         |
| Diethylamine                                   | C <sub>4</sub> H <sub>11</sub> N                              | 73.09            | 25.08    | 1.42  | 0.0206  | HMDB0041878 | +         |
| 4-Hydroxycoumarin                              | C <sub>9</sub> H <sub>6</sub> O <sub>3</sub>                  | 162.03           | 6.52     | 1.26  | 0.0055  | HMDB0003654 | +         |
| Palmitic Acid                                  | C <sub>16</sub> H <sub>32</sub> O <sub>2</sub>                | 273.27           | 9.27     | 2.07  | 0.0319  | HMDB0000220 | +         |
| Thromboxane B2                                 | C <sub>20</sub> H <sub>34</sub> O <sub>6</sub>                | 352.22           | 8.28     | 2.15  | 0.0041  | HMDB0003252 | +         |
| muramic acid                                   | C <sub>9</sub> H <sub>17</sub> N O <sub>7</sub>               | 251.10           | 0.95     | 1.26  | 0.0212  | HMDB0003254 | +         |
| Isoquinoline                                   | C <sub>9</sub> H <sub>7</sub> N                               | 129.06           | 7.87     | 1.23  | 0.0442  | HMDB0034244 | +         |
| 5-Methylcytosine                               | C <sub>5</sub> H <sub>7</sub> N <sub>3</sub> O                | 125.06           | 1.29     | 1.25  | 0.0092  | HMDB0002894 | +         |
| (+/-)11(12)-EET                                | C <sub>20</sub> H <sub>32</sub> O <sub>3</sub>                | 302.22           | 15.48    | 1.81  | 0.0007  | HMDB0010409 | +         |
| Different metabolites                          | Formula                                                       | Molecular Weight | RT [min] | VIP   | p-Value | HMDB ID     | Scan mode |
| 16-Hydroxyhexadecanoic acid                    | C <sub>16</sub> H <sub>32</sub> O <sub>3</sub>                | 254.22           | 16.85    | 6.85  | 0.0259  | HMDB0006294 | -         |
| Gluconic acid                                  | C <sub>6</sub> H <sub>12</sub> O <sub>7</sub>                 | 196.06           | 0.83     | 1.83  | 0.0018  | HMDB0000625 | -         |
| Glycolic acid                                  | C <sub>2</sub> H <sub>4</sub> O <sub>3</sub>                  | 76.02            | 0.84     | 1.27  | 0.0276  | HMDB0000115 | -         |
| Different metabolites between LN and LN+SR61-2 |                                                               |                  |          |       |         |             |           |
| Platelet-activating factor                     | C <sub>26</sub> H <sub>54</sub> N O <sub>7</sub> P            | 523.36           | 18.40    | 1.84  | 0.0032  | METPA0517   | +         |
| 2-palmitoyl-sn-glycero-3-phosphocholine        | C <sub>24</sub> H <sub>50</sub> N O <sub>7</sub> P            | 495.33           | 14.12    | 7.22  | 0.0135  | HMDB0061709 | +         |
| L-alpha-Glycerolphosphorylcholine              | C <sub>8</sub> H <sub>20</sub> N O <sub>6</sub> P             | 257.10           | 0.93     | 5.52  | 0.0070  | HMDB0000086 | +         |

| N, N-Dimethylaniline          | C8 H11 N      | 121.09           | 25.13    | 4.22 | 0.0063  | HMDB0001020 | +         |
|-------------------------------|---------------|------------------|----------|------|---------|-------------|-----------|
| L-Glutamic acid               | C5 H9 N O4    | 147.05           | 0.94     | 1.58 | 0.0341  | HMDB0000148 | +         |
| 3-Aminopropanal               | C3 H7 N O     | 73.05            | 0.92     | 2.30 | 0.0133  | HMDB0001106 | +         |
| Levetiracetam                 | C8 H14 N2 O2  | 170.11           | 0.92     | 2.31 | 0.0121  | HMDB0015333 | +         |
| L-(-)-Methionine              | C5 H11 N O2 S | 149.05           | 1.51     | 1.70 | 0.0232  | HMDB0000696 | +         |
| N-Undecanoylglycine           | C13 H25 N O3  | 243.18           | 8.51     | 3.17 | 0.0311  | HMDB0013286 | +         |
| Acetyl-beta-methylcholine     | C8 H17 N O2   | 159.13           | 1.25     | 3.50 | 0.0000  | HMDB0015654 | +         |
| Oleamide                      | C18 H35 N O   | 281.27           | 21.6     | 1.55 | 0.0258  | HMDB0002117 | +         |
| Palmitoylcarnitine            | C23 H45 N O4  | 399.33           | 14.10    | 1.47 | 0.0040  | HMDB0000222 | +         |
| Acetylcholine                 | C7 H15 N O2   | 145.11           | 1.04     | 1.46 | 0.0131  | HMDB0000895 | +         |
| 5-Hydroxyindole-3-acetic acid | C10 H9 N O3   | 191.06           | 3.28     | 1.96 | 0.0123  | HMDB0000763 | +         |
| Metixene                      | C20 H23 N S   | 309.15           | 17.24    | 1.60 | 0.0032  | HMDB0014484 | +         |
| Arachidonic acid              | C20 H32 O2    | 304.24           | 16.86    | 1.63 | 0.0443  | HMDB0001043 | +         |
| Diethylamine                  | C4 H11 N      | 73.09            | 25.08    | 1.12 | 0.0266  | HMDB0041878 | +         |
| Betaine                       | C5 H11 N O2   | 117.08           | 25.17    | 1.07 | 0.0333  | HMDB0000043 | +         |
| 5-Methylcytosine              | C5 H7 N3 O    | 125.06           | 1.29     | 1.23 | 0.0001  | HMDB0002894 | +         |
| Dihydrothymine                | C5 H8 N2 O2   | 128.06           | 1.01     | 1.18 | 0.0016  | HMDB0000079 | +         |
| Spinacine                     | C7 H9 N3 O2   | 167.07           | 0.80     | 1.06 | 0.0024  | HMDB0029873 | +         |
| Linoleic acid                 | C18 H32 O2    | 280.24           | 18.28    | 6.07 | 0.0418  | HMDB0000673 | -         |
| Different metabolites         | Formula       | Molecular Weight | RT [min] | VIP  | p-Value | HMDB ID     | Scan mode |
| Elaidic acid                  | C18 H34 O2    | 282.26           | 21.04    | 6.15 | 0.0031  | HMDB0000573 | -         |
| Arachidonic acid              | C20 H32 O2    | 304.24           | 17.90    | 2.99 | 0.0415  | HMDB0001043 | -         |
| Stearic acid                  | C18 H36 O2    | 284.27           | 23.28    | 6.42 | 0.0290  | HMDB0000827 | -         |
| Adrenic acid                  | C22 H36 O2    | 332.27           | 21.26    | 1.03 | 0.0104  | HMDB0002226 | -         |
| Gluconic acid                 | C6 H12 O7     | 196.06           | 0.83     | 1.29 | 0.0274  | HMDB0000625 | -         |
| Erythrose                     | C4 H8 O4      | 120.04           | 0.83     | 1.08 | 0.0098  | HMDB0002649 | -         |

R.T.: retention time (minute), cont W: animals not treated with L-NAME receiving standard chow, cont LN: L-NAME treated rats receiving standard chow, LN+SR37-3: L-NAME treated rats receiving PFM-SR37-3, LN+SR61-2: L-NAME treated rats receiving PFM-SR61-2. VIP: variable importance projection. HMDB: The Human Metabolome Database.

**Table S2.** Detection of different metabolites in cecal contents samples.

| Different metabolites                          | Formula       | Molecular Weight | RT [min] | VIP   | p-Value | HMDB ID     | Scan mode |
|------------------------------------------------|---------------|------------------|----------|-------|---------|-------------|-----------|
| Different metabolites between W and LN         |               |                  |          |       |         |             |           |
| Oleamide                                       | C18 H35 N O   | 281.27           | 20.80    | 27.14 | 0.0000  | HMDB0002117 | +         |
| Hexadecanamide                                 | C16 H33 N O   | 255.26           | 19.72    | 12.63 | 0.0000  | HMDB0012273 | +         |
| Linoleamide                                    | C18 H33 N O   | 279.26           | 18.53    | 13.22 | 0.0000  | HMDB0062656 | +         |
| Stearamide                                     | C18 H37 N O   | 283.29           | 24.72    | 8.77  | 0.0031  | HMDB0034146 | +         |
| 3b-Hydroxy-5-cholenoic acid                    | C24 H38 O3    | 374.29           | 11.32    | 8.79  | 0.0002  | HMDB0000308 | +         |
| L-Phenylalanine                                | C9 H11 N O2   | 165.08           | 2.21     | 9.72  | 0.0000  | HMDB0000159 | +         |
| L-Norleucine                                   | C6 H13 N O2   | 131.09           | 1.55     | 9.73  | 0.0000  | HMDB0001645 | +         |
| 3a,7a-Dihydroxycholanoic acid                  | C24 H40 O4    | 392.29           | 11.32    | 5.93  | 0.0016  | HMDB0000384 | +         |
| 2-Pyrrolidone                                  | C4 H7 N O     | 85.05            | 1.22     | 7.68  | 0.0000  | HMDB0002039 | +         |
| L-Valine                                       | C5 H11 N O2   | 117.08           | 1.07     | 7.13  | 0.0000  | HMDB0000883 | +         |
| Tiglic acid                                    | C5 H8 O2      | 100.05           | 1.07     | 7.12  | 0.0000  | HMDB0001470 | +         |
| Ornithine                                      | C5 H12 N2 O2  | 132.09           | 0.80     | 7.01  | 0.0001  | HMDB0000214 | +         |
| N-Acetyl-b-D-glucosamine                       | C8 H15 N O6   | 221.09           | 0.93     | 3.47  | 0.0028  | HMDB0000803 | +         |
| 2b,3a,7a-Trihydroxy-5b-cholanoic acid          | C24 H40 O5    | 408.29           | 8.88     | 3.28  | 0.0025  | HMDB0000404 | +         |
| Ricinoleic Acid                                | C18 H34 O3    | 298.25           | 14.08    | 4.44  | 0.0035  | HMDB0034297 | +         |
| L-(-)-Methionine                               | C5 H11 N O2 S | 149.05           | 1.26     | 2.97  | 0.0020  | HMDB0000696 | +         |
| Valine                                         | C5 H11 N O2   | 117.08           | 1.35     | 2.79  | 0.0000  | HMDB0000883 | +         |
| DL-Tryptophan                                  | C11 H12 N2 O2 | 204.09           | 3.67     | 4.23  | 0.0000  | HMDB0013609 | +         |
| Gly-Phe                                        | C11 H14 N2 O3 | 222.10           | 3.61     | 2.67  | 0.0202  | HMDB0028848 | +         |
| chenodeoxycholic acid                          | C24 H40 O4    | 392.29           | 8.57     | 4.14  | 0.0000  | HMDB0000518 | +         |
| Furfuranol                                     | C5 H6 O2      | 98.037           | 1.23     | 2.17  | 0.0239  | HMDB0013742 | +         |
| 3-(3,4-dihydroxyphenyl) propanoic acid         | C9 H10 O4     | 164.05           | 1.18     | 3.22  | 0.0000  | HMDB0000423 | +         |
| L-Threonine                                    | C4 H9 N O3    | 87.03            | 1.06     | 2.24  | 0.0146  | HMDB0000167 | +         |
| Adenine                                        | C5 H5 N5      | 135.05           | 1.00     | 2.03  | 0.0022  | HMDB0000034 | +         |
| Different metabolites                          | Formula       | Molecular Weight | RT [min] | VIP   | p-Value | HMDB ID     | Scan mode |
| Deoxycholic Acid                               | C24 H40 O4    | 392.29           | 7.79     | 13.58 | 0.0110  | HMDB0000626 | -         |
| Oleic Acid                                     | C18 H34 O2    | 282.26           | 19.54    | 4.92  | 0.0269  | HMDB0000207 | -         |
| 7-ketodeoxycholic acid                         | C24 H38 O5    | 406.27           | 5.95     | 2.18  | 0.0000  | HMDB0000391 | -         |
| Different metabolites between LN and LN+SR37-3 |               |                  |          |       |         |             |           |
| 3b-Hydroxy-5-cholenoic acid                    | C24 H38 O3    | 374.28           | 11.32    | 12.71 | 0.0426  | HMDB0000308 | +         |
| N-Acetyl-b-D-glucosamine                       | C8 H15 N O6   | 221.09           | 0.93     | 12.64 | 0.0002  | HMDB0000803 | +         |
| Uracil                                         | C4 H4 N2 O2   | 95.00            | 1.16     | 4.34  | 0.0322  | HMDB0000300 | +         |
| Hypoxanthine                                   | C5 H4 N4 O    | 136.04           | 1.28     | 5.34  | 0.0135  | HMDB0000157 | +         |
| Thymine                                        | C5 H6 N2 O2   | 126.04           | 1.66     | 5.23  | 0.0067  | HMDB0000262 | +         |
| 6-Methylquinoline                              | C10 H9 N      | 143.07           | 4.00     | 4.62  | 0.0457  | HMDB0033115 | +         |
| Adenine                                        | C5 H5 N5      | 135.05           | 1.00     | 6.49  | 0.0016  | HMDB0000034 | +         |

| L-Valine                                       | C5 H11 N O2     | 117.08           | 0.96     | 4.69  | 0.0474  | HMDB0000883 | +         |
|------------------------------------------------|-----------------|------------------|----------|-------|---------|-------------|-----------|
| Xanthine                                       | C5 H4 N4 O2     | 152.03           | 1.30     | 3.85  | 0.0048  | HMDB0000292 | +         |
| 2-Oxindole                                     | C8 H7 N O       | 133.05           | 5.14     | 4.52  | 0.0207  | HMDB0062549 | +         |
| Urocanic acid                                  | C6 H6 N2 O2     | 138.04           | 1.06     | 2.89  | 0.0225  | HMDB0000301 | +         |
| Nicotinic acid                                 | C6 H5 N O2      | 123.03           | 1.16     | 3.35  | 0.0171  | HMDB0001488 | +         |
| ACPC                                           | C4 H7 N O2      | 101.05           | 0.97     | 4.22  | 0.0042  | HMDB0000230 | +         |
| Formiminoglutamic Acid                         | C6 H10 N2 O4    | 174.06           | 0.92     | 5.65  | 0.0110  | HMDB0000854 | +         |
| 2'-Deoxyinosine                                | C10 H12 N4 O4   | 252.09           | 1.18     | 4.34  | 0.0104  | HMDB0000071 | +         |
| FF-MAS                                         | C29 H46 O       | 410.35           | 19.89    | 3.16  | 0.0252  | HMDB0001023 | +         |
| Acetyl-beta-methylcholine                      | C8 H17 N O2     | 159.13           | 1.03     | 3.30  | 0.0186  | HMDB0015654 | +         |
| Levulinic acid                                 | C5 H8 O3        | 116.05           | 1.01     | 2.33  | 0.0220  | HMDB0000720 | +         |
| 5-(Hydroxymethyl)-2-furaldehyde                | C6 H6 O3        | 126.03           | 0.97     | 2.39  | 0.0247  | HMDB0034355 | +         |
| Glycyl-L-leucine                               | C8 H16 N2 O3    | 188.12           | 2.78     | 2.52  | 0.0192  | HMDB0028929 | +         |
| THC                                            | C21 H30 O2      | 314.22           | 14.85    | 2.23  | 0.0370  | HMDB0014613 | +         |
| Lotaustralin                                   | C11 H19 N O6    | 261.12           | 1.07     | 2.92  | 0.0053  | HMDB0033865 | +         |
| Different metabolites                          | Formula         | Molecular Weight | RT [min] | VIP   | p-Value | HMDB ID     | Scan mode |
| Butobarbital                                   | C10 H16 N2 O3   | 212.12           | 1.18     | 2.6   | 0.0030  | HMDB0015442 | +         |
| Glutarylcarntine                               | C12 H21 N O6    | 275.14           | 1.18     | 2.49  | 0.0014  | HMDB0013130 | +         |
| 2,3,4,5-tetrahydrodipicolinic acid             | C7 H9 N O4      | 171.05           | 1.20     | 2.42  | 0.0058  | HMDB0012289 | +         |
| Pyridoxamine                                   | C8 H12 N2 O2    | 168.09           | 0.83     | 2.26  | 0.0011  | HMDB0001431 | +         |
| Phthalic acid                                  | C8 H6 O4        | 166.03           | 7.34     | 2.71  | 0.0000  | HMDB0002107 | +         |
| Sulfacytine                                    | C12 H14 N4 O3 S | 294.08           | 1.18     | 2.26  | 0.0006  | HMDB0015412 | +         |
| 3-(2-Hydroxyethyl) indole                      | C10 H11 N O     | 161.08           | 5.96     | 2.19  | 0.0011  | HMDB0003447 | +         |
| Alosetron                                      | C17 H18 N4 O    | 294.15           | 5.05     | 2.01  | 0.0001  | HMDB0015104 | -         |
| 16-ketoestrone                                 | C18 H20 O3      | 284.14           | 5.56     | 2.17  | 0.0000  | HMDB0000372 | -         |
| Different metabolites between LN and LN+SR61-2 |                 |                  |          |       |         |             |           |
| 3b-Hydroxy-5-cholenoic acid                    | C24 H38 O3      | 374.28           | 11.32    | 15.86 | 0.0295  | HMDB0000308 | +         |
| L-Norleucine                                   | C6 H13 N O2     | 131.09           | 1.55     | 13.99 | 0.0298  | HMDB0001645 | +         |
| N-Acetyl-b-D-glucosamine                       | C8 H15 N O6     | 221.09           | 0.93     | 11.27 | 0.0450  | HMDB0000803 | +         |
| Ricinoleic Acid                                | C18 H34 O3      | 298.25           | 14.08    | 10.30 | 0.0394  | HMDB0034297 | +         |
| 3a,7b,12b-Trihydroxy-5b-cholanoic acid         | C24 H40 O5      | 408.29           | 7.10     | 8.67  | 0.0177  | HMDB0000390 | +         |
| Hypoxanthine                                   | C5 H4 N4 O      | 136.04           | 1.17     | 5.92  | 0.0103  | HMDB0000157 | +         |
| Thymine                                        | C5 H6 N2 O2     | 126.04           | 1.66     | 3.65  | 0.0274  | HMDB0000262 | +         |
| Phthalic acid                                  | C8 H6 O4        | 166.03           | 12.42    | 2.11  | 0.0001  | HMDB0002107 | +         |
| Glycocholic acid                               | C26 H43 N O6    | 465.31           | 7.07     | 4.67  | 0.0032  | HMDB0000138 | +         |
| THC                                            | C21 H30 O2      | 314.22           | 6.96     | 2.37  | 0.0199  | HMDB0014613 | +         |
| Butobarbital                                   | C10 H16 N2 O3   | 212.12           | 1.18     | 2.30  | 0.0418  | HMDB0015442 | +         |
| Furfuranol                                     | C5 H6 O2        | 98.04            | 1.00     | 2.18  | 0.0455  | HMDB0013742 | +         |
| 3-Oxocholeic acid                              | C24 H38 O5      | 406.27           | 5.84     | 2.07  | 0.0062  | HMDB0000502 | +         |
| Glycochenodeoxycholic acid                     | C26 H43 N O5    | 449.31           | 8.42     | 2.37  | 0.0146  | HMDB0000637 | +         |

| Lithocholic acid       | C24 H40 O3   | 358.29           | 14.42    | 2.18  | 0.0118  | HMDB0000761 | +         |
|------------------------|--------------|------------------|----------|-------|---------|-------------|-----------|
| Dulxanthone H          | C22 H22 O8   | 414.13           | 6.92     | 2.22  | 0.0471  | HMDB0034936 | +         |
| Different metabolites  | Formula      | Molecular Weight | RT [min] | VIP   | p-Value | HMDB ID     | Scan mode |
| Delta-Valerolactam     | C5 H9 N O    | 116.1            | 0.90     | 2.23  | 0.0029  | HMDB0011749 | +         |
| 1-Hydroxy-3-octanone   | C8 H16 O2    | 144.12           | 7.89     | 2.36  | 0.0000  | HMDB0031290 | +         |
| Deoxycholic Acid       | C24 H40 O4   | 392.29           | 7.79     | 18.92 | 0.0045  | HMDB0000626 | -         |
| Lithocholic Acid       | C24 H40 O3   | 376.3            | 10.68    | 9.19  | 0.0487  | HMDB0000761 | -         |
| Varanic acid           | C26 H44 O5   | 436.32           | 10.6     | 6.27  | 0.0392  | HMDB0002195 | -         |
| 7-ketodeoxycholic acid | C24 H38 O5   | 406.27           | 5.95     | 2.44  | 0.0255  | HMDB0000391 | -         |
| 10-GINGEROL            | C21 H34 O4   | 350.25           | 6.92     | 2.05  | 0.0263  | HMDB0005783 | -         |
| Alosetron              | C17 H18 N4 O | 294.15           | 5.05     | 2.96  | 0.0001  | HMDB0015104 | -         |

R.T.: retention time (minute), cont W: animals not treated with L-NAME receiving standard chow, cont LN: L-NAME treated rats receiving standard chow, LN+SR37-3: L-NAME treated rats receiving PFM-SR37-3, LN+SR61-2: L-NAME treated rats receiving PFM-SR61-2. VIP: variable importance projection. HMDB: The Human Metabolome Database.
